# Supplementary material
Source: PubMed Central journal article supplement (PMC2375556)
Supplement: jphysiol_2007.141887_1.pdf [file jphysiol_2007.141887_1.pdf]

**SUPPLEMENTAL MATERIAL**

The supplemental material is a database in Microsoft Excel format comprising a list of the 23 polymorphisms included, the genotype scores allocated to each genotype within each polymorphism, their typical frequencies in the general population and the sources of all data. The database can be used to generate novel polygenic profiles for 1000 hypothetical individuals at a single keystroke and contains an algorithm which calculates the total genotype score (TGS).
